# Supplementary material
Source: HighWire-hosted journal article supplement (https://bmjopen.bmj.com/content/15/3/e086141)
Supplement: inline-supplementary-material-3 [file inline-supplementary-material-3.pdf]

Supplementary Table 2: Distribution of Polydrug Use in the General Population Survey of Drug Use in the United States

| Number of type of drugs used | Frequency | Percentage | Cumulative Percentage |
|------------------------------|-----------|------------|-----------------------|
| 0                            | 2519      | 75.4       | 75.4                  |
| 1                            | 418       | 12.5       | 87.9                  |
| 2                            | 109       | 3.3        | 91.2                  |
| 3                            | 26        | 0.8        | 92                    |
| 4                            | 15        | 0.4        | 92.4                  |
| 5                            | 7         | 0.2        | 92.6                  |
| 6                            | 15        | 0.4        | 93.1                  |
| 7                            | 6         | 0.2        | 93.3                  |
| 8                            | 17        | 0.5        | 93.8                  |
| 9                            | 26        | 0.8        | 94.6                  |
| 10                           | 182       | 5.4        | 100                   |
